# Supplementary material for: Functional Insights From KpfR, a New Transcriptional Regulator of Fimbrial Expression That Is Crucial for Klebsiella pneumoniae Pathogenicity
Source: PubMed Central journal article supplement (PMC7861041; doi:10.3389/fmicb.2020.601921), 2021-01-21
Supplement: Image_1.pdf [file Image_1.pdf]

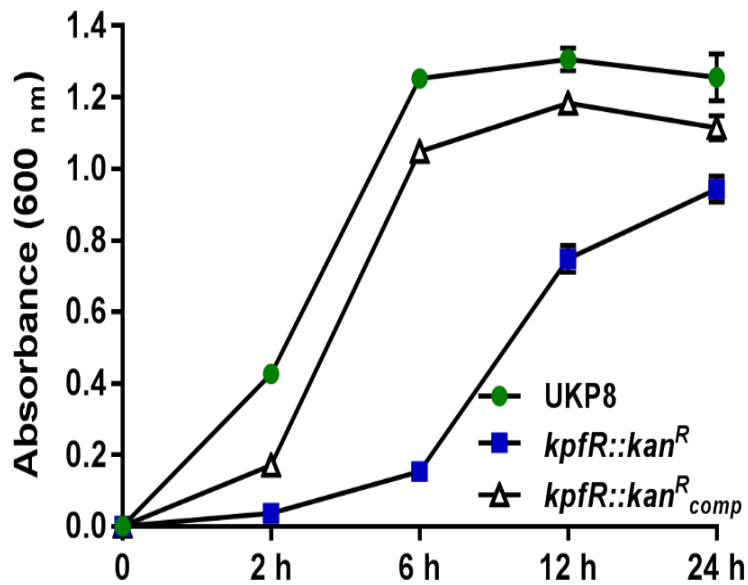

**Figure S1.** Growth curves of UKP8, *kpfR::kan<sup>R</sup>* and *kpfR::kan<sup>R</sup><sub>comp</sub>* assessed by monitoring the optical density of the strains grown in LB medium at 37 °C with agitation. Despite the delayed entry into logarithmic (log) phase due to prolonged growth at lag phase, the mutant strain *kpfR::kan<sup>R</sup>* exhibit a growth rate similar to that observed in the wild-type UKP8 on the log phase. The growth curve observed on the wild-type strain was reestablished on the complemented mutant strain *kpfR::kan<sup>R</sup><sub>comp</sub>*.
