# Supplementary material for: Functional Insights From KpfR, a New Transcriptional Regulator of Fimbrial Expression That Is Crucial for Klebsiella pneumoniae Pathogenicity
Source: PubMed Central journal article supplement (PMC7861041; doi:10.3389/fmicb.2020.601921), 2021-01-21
Supplement: Table_1.pdf [file Table_1.pdf]

**Supplementary Table S1.** Primer pairs used in PCR reactions to confirm the polycistronic transcription of *kpfR* and *kpf* gene cluster. Primer pairs *kpfR*-F and *kpfA*-R were also used to confirm the insertion of the intron in the coding region of the *kpfR* gene.

| <b>Distance</b>            | <b>Primers<sup>1</sup></b> | <b>Sequence (5' &gt; 3')</b> | <b>Amplicon<br/>(base pairs)</b> |
|----------------------------|----------------------------|------------------------------|----------------------------------|
| <i>kpfR</i> to <i>kpfA</i> | <i>kpfR</i> -F             | TTCAACAATTAGCCGCACTG         | 845                              |
|                            | <i>kpfA</i> -R             | TTAGTGATAGGCGCCTCGTT         |                                  |
| <i>kpfA</i> to <i>kpfD</i> | <i>kpfA</i> -F             | GCCAGAAGTTGGGGTCAAT          | 3773                             |
|                            | <i>kpfD</i> -R             | TGCTGGAGACTTTAATGATGCTC      |                                  |

1. F, forward primer; R, reverse primer.
