# Supplementary material for: Functional Insights From KpfR, a New Transcriptional Regulator of Fimbrial Expression That Is Crucial for Klebsiella pneumoniae Pathogenicity
Source: PubMed Central journal article supplement (PMC7861041; doi:10.3389/fmicb.2020.601921), 2021-01-21
Supplement: Table_2.pdf [file Table_2.pdf]

**Supplementary Table S2.** The most efficient insertion site on *kpfR* coding region predicted by TargetTron Design algorithm.

| <b>Position<sup>1</sup></b> | <b>Target sequence</b>                                            | <b>Score<sup>3</sup></b> | <b>E-value<sup>3</sup></b> |
|-----------------------------|-------------------------------------------------------------------|--------------------------|----------------------------|
| 495-496                     | CATCATATTGCTAAGGTCGGTGGCCTGAGC-<br><i>intron</i> -AATTTTCTTATTATT | 9.52                     | 0,034                      |

1. Nucleotide position of the RNA intron insertion at the antisense strand of *kpfR* gene.
2. Nucleotide sequence of the insertion site within *kpfR* gene.
3. *Score* and *E-value* as calculated by TargetTron Design algorithm.
