# Supplementary material for: Functional Insights From KpfR, a New Transcriptional Regulator of Fimbrial Expression That Is Crucial for Klebsiella pneumoniae Pathogenicity
Source: PubMed Central journal article supplement (PMC7861041; doi:10.3389/fmicb.2020.601921), 2021-01-21
Supplement: Table_3.pdf [file Table_3.pdf]

**Supplementary Table S3.** Nucleotide sequence of the primers IBS-*kpfR*, EBS1d-*kpfR* and EBS2-*kpfR* primers generated by TargeTron design algorithm. These primers were used in PCR reactions to retarget the RNA segment of the intron.

| <i>Primers</i>     | <b>Nucleotide sequences (5'&gt;3')</b>                           |
|--------------------|------------------------------------------------------------------|
| IBS- <i>kpfR</i>   | AAAAAAGCTTATAATTATCCTTAGGTGGCCTGAGCGTGCGCCCA<br>GATAGGGTG        |
| EBS1d- <i>kpfR</i> | CAGATTGTACAAATGTGGTGATAACAGATAAGTCCTGAGCAATA<br>ACTTACCTTTCTTTGT |
| EBS2- <i>kpfR</i>  | TGAACGCAAGTTTCTAATTTTCGATTCCACCTCGATAGAGGAAAGT<br>GTCT           |
