# Supplementary material for: Functional Insights From KpfR, a New Transcriptional Regulator of Fimbrial Expression That Is Crucial for Klebsiella pneumoniae Pathogenicity
Source: PubMed Central journal article supplement (PMC7861041; doi:10.3389/fmicb.2020.601921), 2021-01-21
Supplement: Table_4.pdf [file Table_4.pdf]

**Supplementary Table S4.** Primer pairs used to amplify the entire *kpfR* coding region plus 3' and 5' flanking regions to generate the complemented strain.

| <i>Primers</i>                | <b>Sequence (5'&gt;3')</b>   | <b>Tm</b> | <b>Amplicon</b><br>(base pairs) |
|-------------------------------|------------------------------|-----------|---------------------------------|
| <i>kpfR</i> -F <sub>com</sub> | AGCT <u>AAGCTTC</u> AGCCCGAG | 60° C     | 2426                            |
| <i>kpfB</i> -R <sub>com</sub> | GCTGCCACTGCAGATTTTC          |           |                                 |

The forward primer (*kpfR*-F<sub>com</sub>) contains a restriction site for *Hind*III (underlined nucleotides). The PCR product was digested with *Hind*III and *Kpn*I restriction enzymes, rendering a digested fragment of 1825 nucleotides comprising the entire coding region of *kpfR* gene plus 568 nucleotides upstream the ATG start codon of *kpfR* and 555 nucleotides downstream the stop codon TAA of *kpfR*. The digested fragment was cloned on pCR2.1-TOPO vector, and the recombinant vector was used to transform the *kpfR*::*kan*<sup>R</sup> mutant strain to generate the complemented strain.
