# Supplementary material for: Functional Insights From KpfR, a New Transcriptional Regulator of Fimbrial Expression That Is Crucial for Klebsiella pneumoniae Pathogenicity
Source: PubMed Central journal article supplement (PMC7861041; doi:10.3389/fmicb.2020.601921), 2021-01-21
Supplement: Table_5.pdf [file Table_5.pdf]

**Supplementary Table S5.** Primer pairs used on RT-qPCR reactions. Primers were designed using *Primer3 version 4.1.0* web-program, in order to present 60 °C of annealing temperature and amplicon sizes ranging from 95 to 105 base pairs (bp).

| <b>Genes</b><br>(cluster)                         | <b>Primers</b>                   | <b>Sequence (5'-3')</b>                         | <b>Amplicon</b><br>(bp) |
|---------------------------------------------------|----------------------------------|-------------------------------------------------|-------------------------|
| <i>kpfR</i> <sup>1</sup><br>( <i>kpf</i> cluster) | <i>kpfR</i> -F<br><i>kpfR</i> -R | TTCAACAATTAGCCGCACTG<br>ACTGGATCGGCAAGAATCTC    | 95                      |
| <i>kpfA</i><br>( <i>kpf</i> cluster)              | <i>kpfA</i> -F<br><i>kpfA</i> -R | GCCAGAAGTTGGGGTCAAT<br>TTAGTGATAGGCGCTTCGTT     | 99                      |
| <i>fimA</i><br>( <i>fim</i> cluster)              | <i>fimA</i> -F<br><i>fimA</i> -R | CGTCGGTTTCAACATCCAG<br>GGTGGTATTGCTGCTGTCG      | 100                     |
| <i>ecpA</i><br>( <i>ecp</i> cluster)              | <i>ecpA</i> -F<br><i>ecpA</i> -R | AATATTATGGGCGGCAACCT<br>CCGCTGATGATGGAGAAAGT    | 98                      |
| <i>mrkA</i><br>( <i>mrk</i> cluster)              | <i>mrkA</i> -F<br><i>mrkA</i> -R | GGCTGCTGGTGGCACTAAA<br>GCCAGGTAGCCCTGTTGTT      | 105                     |
| <i>galF</i><br>( <i>cps</i> cluster)              | <i>galF</i> -F<br><i>galF</i> -R | GCGAATTTGAAAGCGGTTATT<br>TGAATCATTGGCTTATCAACGA | 110                     |
| <i>rho</i><br>(endogenous control)                | <i>rho</i> -F<br><i>rho</i> -R   | AACTACGACAAGCCGGAAAA<br>ACCGTTACCACGCTCCATAC    | 99                      |

1. This primer pair anneals in the *kpfR* gene at a position upstream to the RNA intron insertion site on *kpfR*.
